# Supplementary material for: Resistance to starvation of first-stage juveniles of the Caribbean spiny lobster
Source: PeerJ. 2017 Jan 4;5:e2852. doi: 10.7717/peerj.2852 (PMC5217524; doi:10.7717/peerj.2852)
Supplement: Data S1 — Supporting information: raw data of the four experiments (warm and cold seasons of PNR and PRS). [file peerj-05-2852-s001.xlsx]

## Sheet: PNR Warm season
Season	Experiment	Treatment	No. Puerulus	Date of introduction	Date of molt to JI	Date of first feed	Carapace length puerulus (mm)	Date of molt to JII	Intermolt period (d)	Date of death
Warm	PNR	FC	1	2012-06-27	2012-07-01	2012-07-02	6.68	2012-07-21	20
Warm	PNR	FC	2	2012-06-27	2012-06-29	2012-06-30	5.42	2012-07-14	15
Warm	PNR	FC	3	2012-07-16	2012-07-20	2012-07-21	6.29	2012-08-09	20
Warm	PNR	FC	4	2012-06-27	2012-06-28	2012-06-29		2012-07-19	21
Warm	PNR	FC	5	2012-06-27	2012-06-29	2012-06-30	5.47	2012-07-19	20
Warm	PNR	FC	6	2012-06-27	2012-06-29	2012-06-30		2012-07-19	20
Warm	PNR	FC	7	2012-06-27	2012-07-01	2012-07-02	6.29	2012-07-16	15
Warm	PNR	FC	8	2012-06-27	2012-06-28	2012-06-29		2012-07-16	18
Warm	PNR	FC	9	2012-06-27	2012-06-29	2012-06-30	5.57	2012-07-20	21
Warm	PNR	FC	10	2012-06-27	2012-06-29	2012-06-30	6.11	2012-07-20	21
Warm	PNR	FC	11	2012-06-27	2012-06-29	2012-06-30	5.72	2012-07-13	14
Warm	PNR	FC	12	2012-06-28	2012-06-30	2012-07-01	6.47	2012-07-14	14
Warm	PNR	FC	13	2012-06-27	2012-06-30	2012-07-01	6.38	2012-07-15	15
Warm	PNR	FC	14	2012-06-27	2012-07-01	2012-07-02	6.61	2012-07-19	18
Warm	PNR	FC	15	2012-06-27	2012-06-30	2012-07-01	6.31	2012-07-12	12
Warm	PNR	FC	16	2012-06-27	2012-06-28	2012-06-29		2012-07-20	22
Warm	PNR	FC	17	2012-06-27	2012-06-28	2012-06-29		2012-07-15	17
Warm	PNR	FC	18	2012-06-28	2012-06-28	2012-06-29		2012-07-19	21
Warm	PNR	FC	19	2012-08-17	2012-08-20	2012-08-21	6.36	2012-09-09	20
Warm	PNR	FC	20	2012-08-20	2012-08-23	2012-08-24	6.69	2012-09-12	20
Warm	PNR	S3	1	2012-07-26	2012-07-27	2012-07-31	6.25	2012-08-16	20
Warm	PNR	S3	2	2012-07-26	2012-07-29	2012-08-02	6.08	2012-08-13	15
Warm	PNR	S3	3	2012-07-27	2012-07-28	2012-08-01	5.98	2012-08-13	16
Warm	PNR	S3	4	2012-08-14	2012-08-17	2012-08-21	6.43	2012-09-06	20
Warm	PNR	S3	5	2012-08-14	2012-08-17	2012-08-21	6.54	2012-09-06	20
Warm	PNR	S3	6	2012-08-17	2012-08-20	2012-08-24	6.15	2012-09-05	16
Warm	PNR	S3	7	2012-07-26	2012-07-27	2012-07-31	6.69	2012-08-11	15
Warm	PNR	S3	8	2012-07-26	2012-07-29	2012-08-02	6.46	2012-08-15	17
Warm	PNR	S3	9	2012-08-14	2012-08-18	2012-08-22	6.63	2012-09-11	24
Warm	PNR	S3	10	2012-08-14	2012-08-19	2012-08-23	6.38	2012-09-10	22
Warm	PNR	S3	11	2012-08-14	2012-08-18	2012-08-22	6.27	2012-09-08	21
Warm	PNR	S3	12	2012-08-17	2012-08-20	2012-08-24	6.48	2012-09-18	29
Warm	PNR	S3	13	2012-07-26	2012-07-28	2012-08-01	6.27	2012-08-16	19
Warm	PNR	S3	14	2012-07-26	2012-07-28	2012-08-01	5.26	2012-08-13	16
Warm	PNR	S3	15	2012-08-14	2012-08-20	2012-08-24	6.09	2012-09-06	17
Warm	PNR	S3	16	2012-08-24	2012-08-26	2012-08-30	6.26	2012-09-13	18
Warm	PNR	S3	17	2012-08-24	2012-08-25	2012-08-29	6.6	2012-09-15	21
Warm	PNR	S3	18	2012-08-17	2012-08-24	2012-08-28	6.64	2012-09-10	17
Warm	PNR	S3	19	2012-08-17	2012-08-22	2012-08-26	6.55	2012-09-09	18
Warm	PNR	S3	20	2012-08-20	2012-08-23	2012-08-27	6.61	2012-09-11	19
Warm	PNR	S6	1	2012-07-26	2012-07-28	2012-08-04	6.43	2012-08-16	19
Warm	PNR	S6	2	2012-07-26	2012-07-27	2012-08-03	6.08	2012-08-17	21
Warm	PNR	S6	3	2012-07-27	2012-07-29	2012-08-05	6.42	2012-08-21	23
Warm	PNR	S6	4	2012-08-14	2012-08-17	2012-07-24	6.45	2012-09-04	18
Warm	PNR	S6	5	2012-08-14	2012-08-20	2012-08-27	6.71	2012-09-07	18
Warm	PNR	S6	6	2012-08-24	2012-08-26	2012-09-02	6.39	2012-09-14	19
Warm	PNR	S6	7	2012-07-26	2012-07-28	2012-08-04	6.25	2012-08-17	20
Warm	PNR	S6	8	2012-07-31	2012-08-01	2012-08-08	6.49	2012-08-19	18
Warm	PNR	S6	9	2012-08-14	2012-08-21	2012-08-28	6.47	2012-09-09	19
Warm	PNR	S6	10	2012-08-14	2012-08-19	2012-08-26	6.17	2012-09-10	22
Warm	PNR	S6	11	2012-08-14	2012-08-22	2012-08-29	6.75	2012-09-11	20
Warm	PNR	S6	12	2012-08-17	2012-08-22	2012-08-29	6.45	2012-09-09	18
Warm	PNR	S6	13	2012-07-31	2012-08-01	2012-08-08	6.62	2012-08-20	19
Warm	PNR	S6	14	2012-07-27	2012-07-29	2012-08-05	6.46	2012-08-19	21
Warm	PNR	S6	15	2012-08-14	2012-08-19	2012-08-26	6.66	2012-09-08	20
Warm	PNR	S6	16	2012-08-14	2012-08-19	2012-08-26	6.44	2012-09-06	18
Warm	PNR	S6	17	2012-08-14	2012-08-19	2012-08-26	6.24	2012-09-07	19
Warm	PNR	S6	18	2012-08-17	2012-08-23	2012-08-30	6.81	2012-09-10	18
Warm	PNR	S6	19	2012-08-17	2012-08-20	2012-08-27	6.54	2012-09-15	26
Warm	PNR	S6	20	2012-08-20	2012-08-23	2012-08-30	6.34	2012-09-10	18
Warm	PNR	S9	1	2012-07-27	2012-07-29	2012-08-08	6.45	2012-08-22	24
Warm	PNR	S9	2	2012-07-26	2012-07-27	2012-08-06	6.14	2012-08-22	26
Warm	PNR	S9	3	2012-07-27	2012-07-29	2012-08-08	6.52			2012-08-14
Warm	PNR	S9	4	2012-08-14	2012-08-20	2012-08-30	6.58			2012-09-13
Warm	PNR	S9	5	2012-08-14	2012-08-16	2012-08-26	6.51			2012-08-25
Warm	PNR	S9	6	2012-08-17	2012-08-22	2012-09-01	6.37	2012-09-17	26
Warm	PNR	S9	7	2012-07-26	2012-07-29	2012-08-08	6.85	2012-08-19	21
Warm	PNR	S9	8	2012-07-26	2012-07-28	2012-08-07	6.33	2012-08-17	20
Warm	PNR	S9	9	2012-08-14	2012-08-18	2012-08-28	6.72			2012-08-28
Warm	PNR	S9	10	2012-08-14	2012-08-19	2012-08-29	6.51	2012-09-13	25
Warm	PNR	S9	11	2012-08-14	2012-08-21	2012-08-31	6.61	2012-09-13	23
Warm	PNR	S9	12	2012-08-17	2012-08-20	2012-08-30	6.01	2012-09-13	24
Warm	PNR	S9	13	2012-07-26	2012-07-27	2012-08-06	6.76	2012-08-18	22
Warm	PNR	S9	14	2012-07-27	2012-07-29	2012-08-08	6.35	2012-08-21	23
Warm	PNR	S9	15	2012-08-14	2012-08-20	2012-08-30	6.27			2012-09-17
Warm	PNR	S9	16	2012-08-14	2012-08-20	2012-08-30	6.11	2012-09-10	21
Warm	PNR	S9	17	2012-08-14	2012-08-20	2012-08-30	6.52	2012-09-14	25
Warm	PNR	S9	18	2012-08-17	2012-08-22	2012-09-01	6.35			2012-09-17
Warm	PNR	S9	19	2012-08-17	2012-08-19	2012-08-29	6.56	2012-09-10	22
Warm	PNR	S9	20	2012-08-20	2012-08-24	2012-09-03	6.69			2012-09-06
Warm	PNR	S12	1	2012-07-26	2012-07-28	2012-08-10	6.68	2012-08-22	25
Warm	PNR	S12	2	2012-07-26	2012-07-27	2012-08-09	6.05			2012-08-24
Warm	PNR	S12	3	2012-07-27	2012-07-28	2012-08-10	6.64			2012-08-09
Warm	PNR	S12	4	2012-08-14	2012-08-20	2012-09-02	6.03	2012-09-17	28
Warm	PNR	S12	5	2012-08-14	2012-08-19	2012-09-01	6.71			2012-09-16
Warm	PNR	S12	6	2012-08-24	2012-08-25	2012-09-07	6.66			2012-09-14
Warm	PNR	S12	7	2012-07-31	2012-08-01	2012-08-14	5.93	2012-08-26	25
Warm	PNR	S12	8	2012-07-26	2012-07-29	2012-08-11	6.52	2012-08-19	21
Warm	PNR	S12	9	2012-08-14	2012-08-21	2012-09-03	6.55	2012-09-16	26
Warm	PNR	S12	10	2012-08-14	2012-08-18	2012-08-31	6.38			2012-09-13
Warm	PNR	S12	11	2012-08-14	2012-08-17	2012-08-30	6.01	2012-09-13	27
Warm	PNR	S12	12	2012-08-17	2012-08-23	2012-08-05	6.34			2012-09-04
Warm	PNR	S12	13	2012-07-26	2012-07-28	2012-08-10	6.93	2012-08-23	26
Warm	PNR	S12	14	2012-07-27	2012-07-29	2012-08-11	6.38	2012-08-27	29
Warm	PNR	S12	15	2012-08-24	2012-08-25	2012-08-07	6.35	2012-09-21	27
Warm	PNR	S12	16	2012-08-14	2012-08-19	2012-09-01	6.22			2012-09-22
Warm	PNR	S12	17	2012-08-14	2012-08-19	2012-09-01	6.12	2012-09-15	27
Warm	PNR	S12	18	2012-08-17	2012-08-24	2012-09-06	6.55			2012-09-22
Warm	PNR	S12	19	2012-08-17	2012-08-23	2012-09-05	6.38			2012-09-10
Warm	PNR	S12	20	2012-08-20	2012-08-24	2012-09-06	6.24	2012-09-19	26
Warm	PNR	S15	1	2012-08-14	2012-08-18	2012-09-03	6.72	2012-09-21	34
Warm	PNR	S15	2	2012-07-26	2012-07-28	2012-08-13	6.38			2012-08-15
Warm	PNR	S15	3	2012-07-27	2012-07-29	2012-08-14	6.3			2012-08-14
Warm	PNR	S15	4	2012-08-14	2012-08-20	2012-09-05	6.47			2012-09-21
Warm	PNR	S15	5	2012-08-14	2012-08-17	2012-09-02	6.56	2012-09-21	35
Warm	PNR	S15	6	2012-08-17	2012-08-20	2012-09-05	6.19	2012-09-20	31
Warm	PNR	S15	7	2012-07-26	2012-07-29	2012-08-14	6.34			2012-08-17
Warm	PNR	S15	8	2012-07-26	2012-07-27	2012-08-12	6.43			2012-08-11
Warm	PNR	S15	9	2012-08-14	2012-08-17	2012-09-02	6.68	2012-09-16	30
Warm	PNR	S15	10	2012-08-14	2012-08-21	2012-09-06	6.48			2012-09-06
Warm	PNR	S15	11	2012-08-14	2012-08-18	2012-09-03	6.22			2012-09-03
Warm	PNR	S15	12	2012-08-17	2012-08-21	2012-09-06	5.38			2012-09-06
Warm	PNR	S15	13	2012-07-26	2012-07-27	2012-08-12	6.04			2012-08-10
Warm	PNR	S15	14	2012-07-27	2012-07-28	2012-08-13	6.57			2012-08-14
Warm	PNR	S15	15	2012-08-14	2012-08-25	2012-09-10	6.49			2012-09-10
Warm	PNR	S15	16	2012-08-14	2012-08-20	2012-09-05	6.12	2012-09-19	30
Warm	PNR	S15	17	2012-08-14	2012-08-20	2012-09-05	6.36			2012-09-03
Warm	PNR	S15	18	2012-08-17	2012-08-23	2012-09-08	6.52	2012-09-23	31
Warm	PNR	S15	19	2012-08-17	2012-08-20	2012-09-05	6.74			2012-09-25
Warm	PNR	S15	20	2012-08-20	2012-08-27	2012-09-12	6.52			2012-09-12
Warm	PNR	S18	1	2012-07-26	2012-07-27	2012-08-15	5.88			2012-08-04
Warm	PNR	S18	2	2012-08-14	2012-08-19	2012-09-07	6.49	2012-09-20	32
Warm	PNR	S18	3	2012-07-27	2012-07-30	2012-08-18	6.55			2012-08-19
Warm	PNR	S18	4	2012-08-14	2012-08-20	2012-09-08	6.48			2012-09-10
Warm	PNR	S18	5	2012-08-24	2012-08-25	2012-09-13	6.33			2012-09-11
Warm	PNR	S18	6	2012-08-17	2012-08-22	2012-08-10	6.77			2012-09-10
Warm	PNR	S18	7	2012-07-26	2012-07-30	2012-08-18	6.65			2012-08-20
Warm	PNR	S18	8	2012-07-26	2012-07-29	2012-08-17	6.43			2012-08-14
Warm	PNR	S18	9	2012-08-14	2012-08-20	2012-09-08	5.82			2012-09-03
Warm	PNR	S18	10	2012-08-14	2012-08-19	2012-09-07	6.68			2012-09-16
Warm	PNR	S18	11	2012-08-14	2012-08-19	2012-09-07	6.51			2012-09-26
Warm	PNR	S18	12	2012-08-17	2012-08-24	2012-09-12	6.54			2012-09-09
Warm	PNR	S18	13	2012-08-14	2012-08-19	2012-09-07	6.41			2012-09-26
Warm	PNR	S18	14	2012-07-27	2012-07-29	2012-08-17	6.48			2012-08-17
Warm	PNR	S18	15	2012-08-24	2012-08-26	2012-09-14	6.45			2012-09-13
Warm	PNR	S18	16	2012-08-14	2012-08-19	2012-09-07	6.18			2012-09-06
Warm	PNR	S18	17	2012-08-14	2012-08-19	2012-09-07	6.45			2012-09-08
Warm	PNR	S18	18	2012-08-17	2012-08-20	2012-09-08	6.33			2012-09-06
Warm	PNR	S18	19	2012-08-17	2012-08-23	2012-09-11	6.45			2012-09-09
Warm	PNR	S18	20	2012-08-24	2012-08-27	2012-09-15	6.93			2012-09-17
Warm	PNR	SC	1	2012-06-27	2012-06-29		6.51			2012-07-14
Warm	PNR	SC	2	2012-06-27	2012-06-29		6.64			2012-07-17
Warm	PNR	SC	3	2012-07-16	2012-07-22		ND			2012-08-09
Warm	PNR	SC	4	2012-06-27	2012-06-29		6.01			2012-07-09
Warm	PNR	SC	5	2012-06-27	2012-06-29		5.78			2012-07-13
Warm	PNR	SC	6	2012-06-27	2012-06-29		5.79			2012-07-10
Warm	PNR	SC	7	2012-06-27	2012-06-29		5.82			2012-07-10
Warm	PNR	SC	8	2012-06-27	2012-06-30		6.74			2012-07-17
Warm	PNR	SC	9	2012-06-27	2012-06-28		ND			2012-07-09
Warm	PNR	SC	10	2012-06-27	2012-06-28		ND			2012-07-10
Warm	PNR	SC	11	2012-06-27	2012-06-29		6.44			2012-07-14
Warm	PNR	SC	12	2012-06-28	2012-07-01		6.64			2012-07-19
Warm	PNR	SC	13	2012-06-27	2012-06-28		ND			2012-07-10
Warm	PNR	SC	14	2012-06-27	2012-06-28		ND			2012-07-13
Warm	PNR	SC	15	2012-06-27	2012-06-29		6.4			2012-07-17
Warm	PNR	SC	16	2012-06-27	2012-06-28		ND			2012-07-13
Warm	PNR	SC	17	2012-07-16	2012-07-22		ND			2012-08-07
Warm	PNR	SC	18	2012-06-28	2012-06-30		6.34			2012-07-10
Warm	PNR	SC	19	2012-08-17	2012-08-20		6.51			2012-09-12
Warm	PNR	SC	20	2012-08-20	2012-08-24		6.46			2012-09-11

## Sheet: PNR Cold season
Season	Experiment	Treatment	No. Puerulus	Date of introduction	Date of molt to JI	Date of first feed	Carapace length puerulus (mm)	Date of molt to JII	Intermolt period (d)	Date of death
Cold	PNR	FC	1	2013-01-18	2013-01-24		6.58	2013-02-12	19
Cold	PNR	FC	2	2013-01-19	2013-01-24		6.44	2013-02-15	22
Cold	PNR	FC	3	2013-02-09	2013-02-15		6.62	2013-03-11	24
Cold	PNR	FC	4	2013-02-09	2013-02-17		6.28	2013-03-14	25
Cold	PNR	FC	5	2013-02-11	2013-02-17		6.55	2013-03-27	38
Cold	PNR	FC	6	2013-02-11	2013-02-18		6.56	2013-04-03	44
Cold	PNR	FC	7	2013-01-29	2013-02-01		6.25	2013-02-18	17
Cold	PNR	FC	8	2013-02-07	2013-02-11		6.4	2013-03-05	22
Cold	PNR	FC	9	2013-02-09	2013-02-17		6.33	2013-03-10	21
Cold	PNR	FC	10	2013-02-09	2013-02-20		6.44	2013-03-10	18
Cold	PNR	FC	11	2013-02-11	2013-02-20		6.39			2013-04-05
Cold	PNR	FC	12	2013-02-11	2013-02-20		6.5			2013-04-07
Cold	PNR	FC	13	2013-01-19	2013-01-24		6.52	2013-02-17	24
Cold	PNR	FC	14	2013-02-09	2013-02-17		6.66	2013-03-09	20
Cold	PNR	FC	15	2013-02-09	2013-02-21		6.45			2013-03-04
Cold	PNR	FC	16	2013-02-11	2013-02-21		6.53	2013-03-09	16
Cold	PNR	FC	17	2013-02-11	2013-02-18		6.45	2013-03-09	19
Cold	PNR	FC	18	2013-02-11	2013-02-20		6.49	2013-03-22	30
Cold	PNR	FC	19	2013-02-12	2013-02-18		6.54	2013-03-21	31
Cold	PNR	FC	20	2013-02-12	2013-02-22		6.33	2013-03-21	27
Cold	PNR	S3	1	2013-02-13	2013-02-21	2013-02-25	6.56	2013-04-05	43
Cold	PNR	S3	2	2013-03-08	2013-03-17	2013-03-21	5.84	2013-04-13	27
Cold	PNR	S3	3	2013-03-08	2013-03-21	2013-03-25	6.78	2013-04-10	20
Cold	PNR	S3	4	2013-03-08	2013-03-17	2013-03-21	6.51	2013-04-10	24
Cold	PNR	S3	5	2013-03-08	2013-03-19	2013-03-23	6.12	2013-04-13	25
Cold	PNR	S3	6	2013-03-11	2013-03-17	2013-03-21	6.21	2013-04-15	29
Cold	PNR	S3	7	2013-02-13	2013-02-21	2013-02-25	6.44	2013-03-15	22
Cold	PNR	S3	8	2013-03-08	2013-03-20	2013-03-24	6.31	2013-04-26	37
Cold	PNR	S3	9	2013-03-08	2013-03-21	2013-03-25	6.31	2013-04-13	23
Cold	PNR	S3	10	2013-03-08	2013-03-13	2013-03-17	6.31	2013-04-07	25
Cold	PNR	S3	11	2013-03-08	2013-03-21	2013-03-25	5.63			2013-04-16
Cold	PNR	S3	12	2013-03-11	2013-03-21	2013-03-25	6.52	2013-04-13	23
Cold	PNR	S3	13	2013-02-13	2013-02-22	2013-02-26	6.33	2013-03-23	29
Cold	PNR	S3	14	2013-03-08	2013-03-21	2013-03-25	6.21			2013-03-29
Cold	PNR	S3	15	2013-03-08	2013-03-16	2013-03-20	5.55	2013-04-11	26
Cold	PNR	S3	16	2013-03-08	2013-03-16	2013-03-20	6.68	2013-04-13	28
Cold	PNR	S3	17	2013-03-08	2013-03-19	2013-03-23	6.84	2013-04-12	24
Cold	PNR	S3	18	2013-03-11	2013-03-15	2013-03-19	6.82	2013-04-07	23
Cold	PNR	S3	19	2013-03-13	2013-03-21	2013-03-25	6.33	2013-04-13	23
Cold	PNR	S3	20	2013-03-13	2013-03-22	2013-03-26	6.34	2013-04-13	22
Cold	PNR	S6	1	2013-02-13	2013-02-22	2013-03-01	5.85			2013-03-31
Cold	PNR	S6	2	2013-03-08	2013-03-15	2013-03-22	6.02	2013-04-07	23
Cold	PNR	S6	3	2013-03-08	2013-03-19	2013-03-26	6.24			2013-03-27
Cold	PNR	S6	4	2013-03-08	2013-03-18	2013-03-25	6.61	2013-04-10	23
Cold	PNR	S6	5	2013-03-08	2013-03-18	2013-03-25	6.25	2013-04-11	24
Cold	PNR	S6	6	2013-03-11	2013-03-19	2013-03-26	6.09			2013-04-10
Cold	PNR	S6	7	2013-02-13	2013-02-22	2013-03-01	6.28			2013-04-09
Cold	PNR	S6	8	2013-03-08	2013-03-16	2013-03-23	6.18	2013-04-16	31
Cold	PNR	S6	9	2013-03-08	2013-03-13	2013-03-20	5.76			2013-04-09
Cold	PNR	S6	10	2013-03-08	2013-03-14	2013-03-21	5.89			2013-04-13
Cold	PNR	S6	11	2013-03-08	2013-03-19	2013-03-26	6.32	2013-04-15	27
Cold	PNR	S6	12	2013-03-11	2013-03-16	2013-03-23	6.35	2013-04-16	31
Cold	PNR	S6	13	2013-02-14	2013-02-20	2013-02-27	5.96			2013-03-23
Cold	PNR	S6	14	2013-03-08	2013-03-21	2013-03-28	6.12			2013-04-09
Cold	PNR	S6	15	2013-03-08	2013-03-21	2013-03-28	5.84	2013-04-16	26
Cold	PNR	S6	16	2013-03-08	2013-03-15	2013-03-22	6.3	2013-04-07	23
Cold	PNR	S6	17	2013-03-08	2013-03-22	2013-03-29	6.21			2013-03-29
Cold	PNR	S6	18	2013-03-11	2013-03-18	2013-03-25	6.56	2013-04-13	26
Cold	PNR	S6	19	2013-03-13	2013-03-20	2013-03-27	6.87	2013-04-13	24
Cold	PNR	S6	20	2013-03-13	2013-03-20	2013-03-27	6.27	2013-04-20	31
Cold	PNR	S9	1	2013-02-14	2013-02-26	2013-03-08	6.44	2013-04-11	44
Cold	PNR	S9	2	2013-03-08	2013-03-15	2013-03-25	6.34	2013-04-10	26
Cold	PNR	S9	3	2013-03-08	2013-03-16	2013-03-26	5.88	2013-04-18	33
Cold	PNR	S9	4	2013-03-08	2013-03-16	2013-03-26	6.34	2013-04-14	29
Cold	PNR	S9	5	2013-03-08	2013-03-17	2013-03-27	6.33	2013-04-13	27
Cold	PNR	S9	6	2013-03-11	2013-03-19	2013-03-29	6.42	2013-04-15	27
Cold	PNR	S9	7	2013-02-14	2013-02-20	2013-03-02	6.55			2013-04-03
Cold	PNR	S9	8	2013-03-08	2013-03-18	2013-03-28	6.42	2013-04-13	26
Cold	PNR	S9	9	2013-03-08	2013-03-18	2013-03-28	6.45			2013-03-27
Cold	PNR	S9	10	2013-03-08	2013-03-15	2013-03-25	6.69	2013-04-14	30
Cold	PNR	S9	11	2013-03-08	2013-03-14	2013-03-24	6.06	2013-04-11	28
Cold	PNR	S9	12	2013-03-11	2013-03-18	2013-03-28	6.18	2013-04-11	24
Cold	PNR	S9	13	2013-02-14	2013-02-16	2013-02-26	6.11			2013-02-26
Cold	PNR	S9	14	2013-03-08	2013-03-21	2013-03-31	6.09			2013-03-29
Cold	PNR	S9	15	2013-03-08	2013-03-22	2013-04-01	6.12	2013-04-24	33
Cold	PNR	S9	16	2013-03-08	2013-03-18	2013-03-28	6.41			2013-03-28
Cold	PNR	S9	17	2013-03-08	2013-03-18	2013-03-28	6.31			2013-03-29
Cold	PNR	S9	18	2013-03-11	2013-03-18	2013-03-28	5.91			2013-03-28
Cold	PNR	S9	19	2013-03-13	2013-03-22	2013-04-01	6.03	2013-04-18	27
Cold	PNR	S9	20	2013-03-13	2013-03-20	2013-03-30	6.41	2013-04-16	27
Cold	PNR	S12	1	2013-02-14	2013-02-24	2013-03-09	6.39			2013-03-11
Cold	PNR	S12	2	2013-03-08	2013-03-18	2013-03-31	6.32	2013-04-20	33
Cold	PNR	S12	3	2013-03-08	2013-03-15	2013-03-28	6.4	2013-04-13	29
Cold	PNR	S12	4	2013-03-08	2013-03-20	2013-04-02	6.33			2013-04-05
Cold	PNR	S12	5	2013-03-08	2013-03-13	2013-03-26	5.9			2013-04-10
Cold	PNR	S12	6	2013-03-11	2013-03-21	2013-04-03	6.37	2013-04-25	35
Cold	PNR	S12	7	2013-02-19	2013-02-22	2013-03-07	6.19			2013-03-06
Cold	PNR	S12	8	2013-03-08	2013-03-18	2013-03-31	6.42			2013-04-10
Cold	PNR	S12	9	2013-03-08	2013-03-20	2013-04-02	5.94			2013-04-10
Cold	PNR	S12	10	2013-03-08	2013-03-18	2013-03-31	6.56	2013-04-16	29
Cold	PNR	S12	11	2013-03-08	2013-03-21	2013-04-03	5.96			2013-03-28
Cold	PNR	S12	12	2013-03-11	2013-03-15	2013-03-28	6.55			2013-03-31
Cold	PNR	S12	13	2013-02-14	2013-02-20	2013-03-05	5.87	2013-04-02	41
Cold	PNR	S12	14	2013-03-08	2013-03-18	2013-03-31	6.11			2013-03-29
Cold	PNR	S12	15	2013-03-08	2013-03-18	2013-03-31	6.1			2013-03-29
Cold	PNR	S12	16	2013-03-08	2013-03-21	2013-04-03	6.51			2013-04-03
Cold	PNR	S12	17	2013-03-08	2013-03-18	2013-03-31	6.14			2013-03-29
Cold	PNR	S12	18	2013-03-11	2013-03-18	2013-03-31	6.48			2013-03-29
Cold	PNR	S12	19	2013-03-13	2013-03-22	2013-04-04	5.83	2013-04-17	26
Cold	PNR	S12	20	2013-03-13	2013-03-19	2013-04-01	6.21			2013-04-24
Cold	PNR	S15	1	2013-02-15	2013-02-24	2013-03-12	6.47			2013-03-11
Cold	PNR	S15	2	2013-03-08	2013-03-18	2013-04-03	6.33			2013-04-10
Cold	PNR	S15	3	2013-03-08	2013-03-18	2013-04-03	6.54	2013-04-20	33
Cold	PNR	S15	4	2013-03-08	2013-03-21	2013-04-06	6.33	2013-04-26	36
Cold	PNR	S15	5	2013-03-08	2013-03-20	2013-04-05	5.88			2013-04-25
Cold	PNR	S15	6	2013-03-11	2013-03-21	2013-04-06	6.11			2013-04-26
Cold	PNR	S15	7	2013-02-15	2013-02-24	2013-03-12	6.51	2013-04-15	50
Cold	PNR	S15	8	2013-03-08	2013-03-21	2013-04-06	6.13			2013-04-18
Cold	PNR	S15	9	2013-03-08	2013-03-18	2013-04-03	6.21			2013-04-10
Cold	PNR	S15	10	2013-03-08	2013-03-18	2013-04-03	6.42			2013-03-31
Cold	PNR	S15	11	2013-03-08	2013-03-17	2013-04-02	6.41			2013-03-27
Cold	PNR	S15	12	2013-03-11	2013-03-19	2013-04-04	6.22			2013-04-03
Cold	PNR	S15	13	2013-02-15	2013-02-23	2013-03-11	6.44			2013-03-04
Cold	PNR	S15	14	2013-03-08	2013-03-13	2013-03-29	6.19			2013-03-29
Cold	PNR	S15	15	2013-03-08	2013-03-20	2013-04-05	6.12			2013-03-29
Cold	PNR	S15	16	2013-03-08	2013-03-18	2013-04-03	6.66			2013-03-28
Cold	PNR	S15	17	2013-03-08	2013-03-18	2013-04-03	6.15			2013-04-03
Cold	PNR	S15	18	2013-03-11	2013-03-20	2013-04-05	6.07	2013-04-25	36
Cold	PNR	S15	19	2013-03-15	2013-03-22	2013-04-07	6.12	2013-04-27	36
Cold	PNR	S15	20	2013-03-15	2013-03-22	2013-04-07	6.26			2013-04-07
Cold	PNR	S18	1	2013-02-15	2013-02-24	2013-03-15	6.41			2013-03-06
Cold	PNR	S18	2	2013-03-08	2013-03-21	2013-04-09	6.33			2013-04-08
Cold	PNR	S18	3	2013-03-08	2013-03-20	2013-04-08	5.93			2013-04-09
Cold	PNR	S18	4	2013-03-08	2013-03-22	2013-04-10	5.99			2013-04-07
Cold	PNR	S18	5	2013-03-08	2013-03-13	2013-04-01	6.6	2013-04-20	38
Cold	PNR	S18	6	2013-03-11	2013-03-20	2013-04-08	6.38			2013-04-08
Cold	PNR	S18	7	2013-03-08	2013-03-19	2013-04-07	6.52			2013-03-29
Cold	PNR	S18	8	2013-03-08	2013-03-20	2013-04-08	6.21			2013-04-07
Cold	PNR	S18	9	2013-03-08	2013-03-18	2013-04-06	6.6			2013-03-29
Cold	PNR	S18	10	2013-03-08	2013-03-18	2013-04-06	6.41			2013-03-31
Cold	PNR	S18	11	2013-03-08	2013-03-21	2013-04-09	6.02			2013-04-09
Cold	PNR	S18	12	2013-03-11	2013-03-22	2013-04-10	6.05			2013-04-05
Cold	PNR	S18	13	2013-03-08	2013-03-13	2013-04-01	6.35			2013-03-31
Cold	PNR	S18	14	2013-03-08	2013-03-14	2013-04-02	6.23			2013-03-29
Cold	PNR	S18	15	2013-03-08	2013-03-21	2013-04-09	5.99			2013-04-03
Cold	PNR	S18	16	2013-03-08	2013-03-19	2013-04-07	6.24	2013-04-25	37
Cold	PNR	S18	17	2013-03-08	2013-03-20	2013-04-08	6.04			2013-04-03
Cold	PNR	S18	18	2013-03-11	2013-03-19	2013-04-07	5.83			2013-03-29
Cold	PNR	S18	19	2013-03-15	2013-03-20	2013-04-08	6.44	2013-04-27	38
Cold	PNR	S18	20	2013-03-15	2013-03-21	2013-04-09	5.95			2013-04-07
Cold	PNR	SC	1	2013-01-10	2013-01-15		5.89			2013-01-29
Cold	PNR	SC	2	2013-01-19	2013-01-24		6.15			2013-02-06
Cold	PNR	SC	3	2013-02-09	2013-02-21		6.57			2013-03-11
Cold	PNR	SC	4	2013-02-09	2013-02-17		6.44			2013-03-04
Cold	PNR	SC	5	2013-02-11	2013-02-19		6.38			2013-03-07
Cold	PNR	SC	6	2013-02-11	2013-02-21		6.19			2013-03-05
Cold	PNR	SC	7	2013-01-18	2013-01-21		6.05			2013-01-29
Cold	PNR	SC	8	2013-02-07	2013-02-15		6.28			2013-03-05
Cold	PNR	SC	9	2013-02-09	2013-02-17		6.19			2013-03-07
Cold	PNR	SC	10	2013-02-09	2013-02-15		6.29			2013-03-07
Cold	PNR	SC	11	2013-02-11	2013-02-22		6.32			2013-03-04
Cold	PNR	SC	12	2013-02-11	2013-02-19		6.57			2013-03-09
Cold	PNR	SC	13	2013-01-19	2013-01-20		5.92			2013-02-13
Cold	PNR	SC	14	2013-02-09	2013-02-20		6.45			2013-03-04
Cold	PNR	SC	15	2013-02-09	2013-02-21		6.43			2013-03-08
Cold	PNR	SC	16	2013-02-13	2013-02-22		6.46			2013-03-08
Cold	PNR	SC	17	2013-02-19	2013-02-23		6.41			2013-03-08
Cold	PNR	SC	18	2013-02-11	2013-02-18		6.4			2013-03-07
Cold	PNR	SC	19	2013-02-12	2013-02-21		6.22			2013-03-07
Cold	PNR	SC	20	2013-02-12	2013-02-20		6.33			2013-03-02

## Sheet: PRS Warm season
Season	Experiment	Treatment	No. Puerulus	Date of introduction	Date of molt to JI	Date of first feed	Date of last feed	Carapace length puerulus (mm)	Date of molt to JII	Intermolt period (d)	Date of death
Warm	PRS	FC	1	2014-07-22	2014-07-28	2014-07-29		6.61	2014-08-13	16
Warm	PRS	FC	2	2014-08-01	2014-08-07	2014-08-08		5.88	2014-08-26	19
Warm	PRS	FC	3	2014-08-04	2014-08-06	2014-08-07		5.87	2014-08-15	9
Warm	PRS	FC	4	2014-08-04	2014-08-06	2014-08-07		6.44	2014-08-20	14
Warm	PRS	FC	5	2014-08-04	2014-08-07	2014-08-08		6.33	2014-08-21	14
Warm	PRS	FC	6	2014-08-04	2014-08-06	2014-08-07		6.35	2014-08-22	16
Warm	PRS	FC	7	2014-07-22	2014-07-27	2014-07-28		5.99	2014-08-12	16
Warm	PRS	FC	8	2014-08-01	2014-08-04	2014-08-05		5.95	2014-08-24	20
Warm	PRS	FC	9	2014-08-04	2014-08-07	2014-08-08		5.91	2014-08-24	17
Warm	PRS	FC	10	2014-08-04	2014-08-06	2014-08-07		6.08	2014-08-25	19
Warm	PRS	FC	11	2014-08-04	2014-08-06	2014-08-07		5.52	2014-08-25	19
Warm	PRS	FC	12	2014-08-04	2014-08-07	2014-08-08		5.72	2014-08-24	17
Warm	PRS	FC	13	2014-08-01	2014-08-03	2014-08-04		5.25	2014-08-19	16
Warm	PRS	FC	14	2014-08-01	2014-08-06	2014-08-07		5.95	2014-08-16	10
Warm	PRS	FC	15	2014-08-04	2014-08-06	2014-08-07		5.79	2014-08-23	17
Warm	PRS	FC	16	2014-08-04	2014-08-06	2014-08-07		6.25	2014-08-23	17
Warm	PRS	FC	17	2014-08-04	2014-08-05	2014-08-06		6.72	2014-08-25	20
Warm	PRS	FC	18	2014-08-04	2014-08-06	2014-08-07		5.85	2014-08-22	16
Warm	PRS	FC	19	2014-08-04	2014-08-07	2014-08-08		6.03	2014-08-23	16
Warm	PRS	FC	20	2014-08-04	2014-08-06	2014-08-07		5.42	2014-08-24	18
Warm	PRS	F3	1	2014-08-04	2014-08-08	2014-08-09	2014-08-11	5.89			2014-08-26
Warm	PRS	F3	2	2014-08-25	2014-08-26	2014-08-27	2014-08-29	6.45			2014-09-08
Warm	PRS	F3	3	2014-09-01	2014-09-03	2014-09-04	2014-09-06	5.62			2014-09-15
Warm	PRS	F3	4	2014-09-04	2014-09-07	2014-09-08	2014-09-10	6.27			2014-09-22
Warm	PRS	F3	5	2014-09-17	2014-09-24	2014-09-25	2014-09-27	6.24			2014-10-05
Warm	PRS	F3	6	2014-09-23	2014-09-30	2014-10-01	2014-10-03	5.96			2014-10-11
Warm	PRS	F3	7	2014-08-04	2014-08-07	2014-08-08	2014-08-10	6.07			2014-08-24
Warm	PRS	F3	8	2014-08-25	2014-08-26	2014-08-27	2014-08-29	6.42			2014-09-10
Warm	PRS	F3	9	2014-09-01	2014-09-04	2014-09-05	2014-09-07	5.95			2014-09-18
Warm	PRS	F3	10	2014-09-04	2014-09-07	2014-09-08	2014-09-10	6.41			2014-09-23
Warm	PRS	F3	11	2014-09-20	2014-09-30	2014-10-01	2014-10-03	6.21			2014-10-15
Warm	PRS	F3	12	2014-09-23	2014-10-02	2014-10-03	2014-10-05	6.24			2014-10-23
Warm	PRS	F3	13	2014-08-04	2014-08-07	2014-08-08	2014-08-10	6.16			2014-08-12
Warm	PRS	F3	14	2014-08-29	2014-09-02	2014-09-03	2014-09-05	5.33			2014-09-17
Warm	PRS	F3	15	2014-09-01	2014-09-02	2014-09-03	2014-09-05	5.72			2014-09-15
Warm	PRS	F3	16	2014-09-04	2014-09-07	2014-09-08	2014-09-10	6.42			2014-09-22
Warm	PRS	F3	17	2014-09-20	2014-09-30	2014-10-01	2014-10-03	5.91			2014-10-19
Warm	PRS	F3	18	2014-09-23	2014-10-02	2014-10-03	2014-10-05	5.8			2014-10-29
Warm	PRS	F3	19	2014-09-27	2014-10-02	2014-10-03	2014-10-05	6.31			2014-10-12
Warm	PRS	F3	20	2014-09-27	2014-10-02	2014-10-03	2014-10-05	5.95			2014-10-13
Warm	PRS	F6	1	2014-08-04	2014-08-07	2014-08-08	2014-08-13	6.32			2014-08-28
Warm	PRS	F6	2	2014-08-29	2014-09-03	2014-09-04	2014-09-09	5.51			2014-09-19
Warm	PRS	F6	3	2014-09-01	2014-09-02	2014-09-03	2014-09-08	5.67			2014-09-15
Warm	PRS	F6	4	2014-09-04	2014-09-07	2014-09-08	2014-09-13	6.03			2014-09-23
Warm	PRS	F6	5	2014-09-20	2014-09-30	2014-10-01	2014-10-06	5.77			2014-10-12
Warm	PRS	F6	6	2014-09-23	2014-09-25	2014-09-26	2014-10-01	6.51			2014-10-14
Warm	PRS	F6	7	2014-08-04	2014-08-05	2014-08-06	2014-08-11	6.85			2014-08-23
Warm	PRS	F6	8	2014-08-29	2014-09-04	2014-09-05	2014-09-10	6.01			2014-09-19
Warm	PRS	F6	9	2014-09-01	2014-09-04	2014-09-05	2014-09-10	5.91			2014-09-23
Warm	PRS	F6	10	2014-09-04	2014-09-07	2014-09-08	2014-09-13	6.35			2014-09-24
Warm	PRS	F6	11	2014-09-20	2014-09-30	2014-10-01	2014-10-06	5.98			2014-10-20
Warm	PRS	F6	12	2014-09-23	2014-10-02	2014-10-03	2014-10-08	5.41			2014-10-16
Warm	PRS	F6	13	2014-08-25	2014-08-26	2014-08-27	2014-09-01	6.22			2014-09-15
Warm	PRS	F6	14	2014-08-29	2014-09-04	2014-09-05	2014-09-10	5.95			2014-09-22
Warm	PRS	F6	15	2014-09-01	2014-09-04	2014-09-05	2014-09-10	6.15			2014-09-24
Warm	PRS	F6	16	2014-09-04	2014-09-07	2014-09-08	2014-09-13	6.4			2014-09-25
Warm	PRS	F6	17	2014-09-20	2014-09-30	2014-10-01	2014-10-06	5.58			2014-10-21
Warm	PRS	F6	18	2014-09-23	2014-10-02	2014-10-03	2014-10-08	6.23			2014-10-29
Warm	PRS	F6	19	2014-09-27	2014-09-30	2014-10-01	2014-10-06	5.65			2014-10-14
Warm	PRS	F6	20	2014-09-27	2014-09-30	2014-10-01	2014-10-06	5.66			2014-10-20
Warm	PRS	F9	1	2014-08-25	2014-08-26	2014-08-27	2014-09-04	6.61	2014-09-08	13
Warm	PRS	F9	2	2014-08-29	2014-09-03	2014-09-04	2014-09-12	6.17			2014-09-23
Warm	PRS	F9	3	2014-09-02	2014-09-04	2014-09-05	2014-09-13	6.66			2014-09-27
Warm	PRS	F9	4	2014-09-04	2014-09-05	2014-09-06	2014-09-14	6.36			2014-09-27
Warm	PRS	F9	5	2014-09-20	2014-09-25	2014-09-26	2014-10-04	6.16			2014-10-14
Warm	PRS	F9	6	2014-09-23	2014-09-30	2014-10-01	2014-10-09	6.44	2014-10-15	15
Warm	PRS	F9	7	2014-08-25	2014-08-26	2014-08-27	2014-09-04	6.22			2014-09-22
Warm	PRS	F9	8	2014-08-29	2014-09-03	2014-09-04	2014-09-12	6.11			2014-09-25
Warm	PRS	F9	9	2014-09-02	2014-09-04	2014-09-05	2014-09-13	6.23			2014-09-26
Warm	PRS	F9	10	2014-09-04	2014-09-07	2014-09-08	2014-09-16	6.44	2014-09-22	15
Warm	PRS	F9	11	2014-09-20	2014-09-27	2014-09-28	2014-10-06	5.42			2014-10-13
Warm	PRS	F9	12	2014-09-23	2014-09-30	2014-10-01	2014-10-09	5.52			2014-10-25
Warm	PRS	F9	13	2014-08-25	2014-08-26	2014-08-27	2014-09-04	6.14	2014-09-10	15
Warm	PRS	F9	14	2014-08-29	2014-09-03	2014-09-04	2014-09-12	5.55			2014-09-24
Warm	PRS	F9	15	2014-09-02	2014-09-04	2014-09-05	2014-09-13	6.44			2014-09-27
Warm	PRS	F9	16	2014-09-04	2014-09-07	2014-09-08	2014-09-16	6.01	2014-09-20	13
Warm	PRS	F9	17	2014-09-20	2014-09-24	2014-09-25	2014-10-03	5.7			2014-10-14
Warm	PRS	F9	18	2014-09-23	2014-09-30	2014-10-01	2014-10-09	5.54			2014-10-26
Warm	PRS	F9	19	2014-09-27	2014-10-02	2014-10-03	2014-10-11	5.74			2014-10-23
Warm	PRS	F9	20	2014-09-27	2014-09-30	2014-10-01	2014-10-09	5.27			2014-10-29
Warm	PRS	F12	1	2014-08-25	2014-08-26	2014-08-27	2014-09-07	6.08			2014-09-27
Warm	PRS	F12	2	2014-08-29	2014-09-03	2014-09-04	2014-09-15	5.76			2014-09-30
Warm	PRS	F12	3	2014-09-02	2014-09-04	2014-09-05	2014-09-16	6.07	2014-09-14	10
Warm	PRS	F12	4	2014-09-08	2014-09-10	2014-09-11	2014-09-22	6.52			2014-10-12
Warm	PRS	F12	5	2014-09-20	2014-09-24	2014-09-25	2014-10-06	6.11	2014-10-16	22
Warm	PRS	F12	6	2014-09-23	2014-09-27	2014-09-28	2014-10-09	6.09	2014-10-13	16
Warm	PRS	F12	7	2014-08-25	2014-08-26	2014-08-27	2014-09-07	6.5			2014-09-25
Warm	PRS	F12	8	2014-08-29	2014-09-03	2014-09-04	2014-09-15	6.43	2014-09-15	12
Warm	PRS	F12	9	2014-09-02	2014-09-04	2014-09-05	2014-09-16	5.89			2014-09-30
Warm	PRS	F12	10	2014-09-08	2014-09-10	2014-09-11	2014-09-22	6.33	2014-09-17	7
Warm	PRS	F12	11	2014-09-20	2014-09-23	2014-09-24	2014-10-05	5.84	2014-10-07	14
Warm	PRS	F12	12	2014-09-27	2014-09-28	2014-09-29	2014-10-10	5.13	2014-10-13	15
Warm	PRS	F12	13	2014-08-25	2014-08-27	2014-08-28	2014-09-08	6.24	2014-09-12	16
Warm	PRS	F12	14	2014-08-29	2014-09-03	2014-09-04	2014-09-15	5.88	2014-09-17	14
Warm	PRS	F12	15	2014-09-02	2014-09-04	2014-09-05	2014-09-16	6.41	2014-09-14	10
Warm	PRS	F12	16	2014-09-17	2014-09-23	2014-09-24	2014-10-05	6.04			2014-10-15
Warm	PRS	F12	17	2014-09-20	2014-09-24	2014-09-25	2014-10-06	6.41			2014-10-20
Warm	PRS	F12	18	2014-09-27	2014-09-28	2014-09-29	2014-10-10	6.42			2014-10-28
Warm	PRS	F12	19	2014-09-27	2014-09-30	2014-10-01	2014-10-12	5.99			2014-10-30
Warm	PRS	F12	20	2014-09-27	2014-09-30	2014-10-01	2014-10-12	6.01	2014-10-16	16
Warm	PRS	F15	1	2014-08-25	2014-08-28	2014-08-29	2014-09-12	6.5	2014-09-11	14
Warm	PRS	F15	2	2014-08-29	2014-09-03	2014-09-04	2014-09-18	6.03	2014-09-14	11
Warm	PRS	F15	3	2014-09-02	2014-09-04	2014-09-05	2014-09-19	5.27	2014-09-22	18
Warm	PRS	F15	4	2014-09-17	2014-09-23	2014-09-24	2014-10-08	6.1	2014-10-09	16
Warm	PRS	F15	5	2014-09-20	2014-09-24	2014-09-25	2014-10-09	6.07	2014-10-13	19
Warm	PRS	F15	6	2014-09-27	2014-09-28	2014-09-29	2014-10-13	6.44	2014-10-15	17
Warm	PRS	F15	7	2014-08-25	2014-08-29	2014-08-30	2014-09-13	5.95			2014-09-30
Warm	PRS	F15	8	2014-08-29	2014-09-03	2014-09-04	2014-09-18	6.33	2014-09-15	12
Warm	PRS	F15	9	2014-09-02	2014-09-04	2014-09-05	2014-09-19	6.51	2014-09-14	10
Warm	PRS	F15	10	2014-09-17	2014-09-24	2014-09-25	2014-10-09	6.73	2014-10-09	15
Warm	PRS	F15	11	2014-09-23	2014-09-26	2014-09-27	2014-10-11	5.91			2014-10-29
Warm	PRS	F15	12	2014-09-27	2014-09-28	2014-09-29	2014-10-13	6.02			2014-10-30
Warm	PRS	F15	13	2014-08-25	2014-08-28	2014-08-29	2014-09-12	6.61	2014-09-12	15
Warm	PRS	F15	14	2014-09-01	2014-09-03	2014-09-04	2014-09-18	6.32	2014-09-16	13
Warm	PRS	F15	15	2014-09-02	2014-09-04	2014-09-05	2014-09-19	6.45	2014-09-19	15
Warm	PRS	F15	16	2014-09-17	2014-09-23	2014-09-24	2014-10-08	6.7	2014-10-12	19
Warm	PRS	F15	17	2014-09-23	2014-09-27	2014-09-28	2014-10-12	6.04	2014-10-14	17
Warm	PRS	F15	18	2014-09-27	2014-09-28	2014-09-29	2014-10-13	6.48	2014-10-12	14
Warm	PRS	F15	19	2014-09-27	2014-09-28	2014-09-29	2014-10-13	5.65			2014-10-30
Warm	PRS	F15	20	2014-09-27	2014-09-28	2014-09-29	2014-10-13	6.03			2014-11-03
Warm	PRS	F18	1	2014-08-25	2014-08-30	2014-08-31	2014-09-17	6.41	2014-09-17	18
Warm	PRS	F18	2	2014-09-01	2014-09-03	2014-09-04	2014-09-21	5.91	2014-09-14	11
Warm	PRS	F18	3	2014-09-04	2014-09-07	2014-09-08	2014-09-25	5.98	2014-09-22	15
Warm	PRS	F18	4	2014-09-17	2014-09-25	2014-09-26	2014-10-13	6.66	2014-10-13	18
Warm	PRS	F18	5	2014-09-23	2014-09-26	2014-09-27	2014-10-14	6.21	2014-10-20	24
Warm	PRS	F18	6	2014-09-27	2014-09-28	2014-09-29	2014-10-16	6.33	2014-10-17	19
Warm	PRS	F18	7	2014-08-25	2014-08-30	2014-08-31	2014-09-17	5.49	2014-09-18	19
Warm	PRS	F18	8	2014-09-01	2014-09-03	2014-09-04	2014-09-21	6.22			2014-10-14
Warm	PRS	F18	9	2014-09-04	2014-09-05	2014-09-06	2014-09-23	6.53	2014-09-22	17
Warm	PRS	F18	10	2014-09-17	2014-09-23	2014-09-24	2014-10-11	6.22	2014-10-13	20
Warm	PRS	F18	11	2014-09-23	2014-09-24	2014-09-25	2014-10-12	6.21			2014-11-05
Warm	PRS	F18	12	2014-09-27	2014-09-28	2014-09-29	2014-10-16	5.99	2014-10-16	18
Warm	PRS	F18	13	2014-08-25	2014-08-28	2014-08-29	2014-09-15	6.36	2014-09-12	15
Warm	PRS	F18	14	2014-09-01	2014-09-04	2014-09-05	2014-09-22	5.91	2014-09-17	13
Warm	PRS	F18	15	2014-09-04	2014-09-05	2014-09-06	2014-09-23	5.94	2014-09-23	18
Warm	PRS	F18	16	2014-09-17	2014-09-23	2014-09-24	2014-10-11	6.31	2014-10-13	20
Warm	PRS	F18	17	2014-09-23	2014-09-26	2014-09-27	2014-10-14	6.39	2014-10-20	24
Warm	PRS	F18	18	2014-09-27	2014-09-28	2014-09-29	2014-10-16	6.33	2014-10-14	16
Warm	PRS	F18	19	2014-09-27	2014-09-28	2014-09-29	2014-10-16	6.02			2014-11-02
Warm	PRS	F18	20	2014-09-27	2014-09-28	2014-09-29	2014-10-16	6.81			2014-10-29
Warm	PRS	SC	1	2014-07-22	2014-07-26			6.01			2014-08-11
Warm	PRS	SC	2	2014-08-01	2014-08-06			5.47			2014-08-19
Warm	PRS	SC	3	2014-08-01	2014-08-02			6.27			2014-08-17
Warm	PRS	SC	4	2014-08-04	2014-08-05			6			2014-08-16
Warm	PRS	SC	5	2014-08-04	2014-08-06			5.98			2014-08-22
Warm	PRS	SC	6	2014-08-04	2014-08-06			6.37			2014-08-17
Warm	PRS	SC	7	2014-07-28	2014-07-29			6.24			2014-08-03
Warm	PRS	SC	8	2014-08-01	2014-08-03			5.81			2014-08-15
Warm	PRS	SC	9	2014-08-04	2014-08-06			6.31			2014-08-20
Warm	PRS	SC	10	2014-08-04	2014-08-06			6.56			2014-08-13
Warm	PRS	SC	11	2014-08-04	2014-08-06			5.91			2014-08-11
Warm	PRS	SC	12	2014-08-04	2014-08-05			6.08			2014-08-13
Warm	PRS	SC	13	2014-07-28	2014-07-29			6.62			2014-08-03
Warm	PRS	SC	14	2014-08-01	2014-08-05			6.57			2014-08-20
Warm	PRS	SC	15	2014-08-04	2014-08-05			6.49			2014-08-13
Warm	PRS	SC	16	2014-08-04	2014-08-06			5.9			2014-08-23
Warm	PRS	SC	17	2014-08-04	2014-08-06			6.01			2014-08-11
Warm	PRS	SC	18	2014-08-04	2014-08-06			5.92			2014-08-13
Warm	PRS	SC	19	2014-08-04	2014-08-06			5.85			2014-08-20
Warm	PRS	SC	20	2014-08-04	2014-08-06			5.21			2014-08-22

## Sheet: PRS Cold season
Season	Experiment	Treatment	No. Puerulus	Date of introduction	Date of molt to JI	Date of first feed	Date of last feed	Carapace length puerulus (mm)	Date of molt to JII	Intermolt period (d)	Date of death
Cold	PRS	FC	1	2014-01-10	2014-01-11	2014-01-12		6.11	2014-02-10	30
Cold	PRS	FC	2	2014-01-27	2014-02-06	2014-02-07		6.21	2014-03-08	30
Cold	PRS	FC	3	2014-01-27	2014-02-03	2014-02-04		6.33	2014-02-19	16
Cold	PRS	FC	4	2014-01-27	2014-02-06	2014-02-07		6.29	2014-03-03	25
Cold	PRS	FC	5	2014-01-27	2014-02-06	2014-02-07		6.07	2014-03-08	30
Cold	PRS	FC	6	2014-01-27	2014-02-05	2014-02-06		6.31	2014-03-07	30
Cold	PRS	FC	7	2014-01-10	2014-01-11	2014-01-12		6.54	2014-02-03	23
Cold	PRS	FC	8	2014-01-27	2014-02-01	2014-02-02		6.29	2014-02-20	19
Cold	PRS	FC	9	2014-01-27	2014-02-03	2014-02-04		5.97	2014-03-06	31
Cold	PRS	FC	10	2014-01-27	2014-02-03	2014-02-04		6.09	2014-03-04	29
Cold	PRS	FC	11	2014-01-27	2014-02-03	2014-02-04		6.33	2014-02-25	22
Cold	PRS	FC	12	2014-01-30	2014-02-03	2014-02-04		6.11	2014-03-08	33
Cold	PRS	FC	13	2014-01-10	2014-01-11	2014-01-12		6.42	2014-02-14	34
Cold	PRS	FC	14	2014-01-27	2014-02-06	2014-02-07		6.06	2014-03-01	23
Cold	PRS	FC	15	2014-01-27	2014-02-06	2014-02-07		5.97	2014-03-06	28
Cold	PRS	FC	16	2014-01-27	2014-01-31	2014-02-01		5.87	2014-02-26	26
Cold	PRS	FC	17	2014-01-27	2014-02-04	2014-02-05		6.53	2014-03-02	26
Cold	PRS	FC	18	2014-01-27	2014-02-04	2014-02-05		5.92	2014-02-23	19
Cold	PRS	FC	19	2014-01-27	2014-02-03	2014-02-04		6.18	2014-02-23	20
Cold	PRS	FC	20	2014-01-30	2014-02-06	2014-02-07		6.12	2014-02-26	20
Cold	PRS	F3	1	2014-02-03	2014-02-08	2014-02-09	2014-02-11	6.35			2014-03-08
Cold	PRS	F3	2	2014-02-03	2014-02-11	2014-02-12	2014-02-14	6.04			2014-03-03
Cold	PRS	F3	3	2014-02-03	2014-02-10	2014-02-11	2014-02-13	6.22			2014-02-27
Cold	PRS	F3	4	2014-02-06	2014-02-07	2014-02-08	2014-02-10	6.29			2014-02-26
Cold	PRS	F3	5	2014-02-25	2014-02-28	2014-03-01	2014-03-03	6.56			2014-03-19
Cold	PRS	F3	6	2014-02-25	2014-02-27	2014-02-28	2014-03-02	6.21			2014-03-19
Cold	PRS	F3	7	2014-02-03	2014-02-07	2014-02-08	2014-02-10	5.91			2014-02-20
Cold	PRS	F3	8	2014-02-03	2014-02-06	2014-02-07	2014-02-09	5.87			2014-02-18
Cold	PRS	F3	9	2014-02-03	2014-02-11	2014-02-12	2014-02-14	5.97			2014-03-05
Cold	PRS	F3	10	2014-02-06	2014-02-07	2014-02-08	2014-02-10	6.44			2014-02-20
Cold	PRS	F3	11	2014-02-25	2014-03-04	2014-03-05	2014-03-07	6.52			2014-03-20
Cold	PRS	F3	12	2014-02-25	2014-03-05	2014-03-06	2014-03-08	6.17			2014-03-21
Cold	PRS	F3	13	2014-02-03	2014-02-12	2014-02-13	2014-02-15	5.97			2014-03-02
Cold	PRS	F3	14	2014-02-03	2014-02-08	2014-02-09	2014-02-11	6.34			2014-02-26
Cold	PRS	F3	15	2014-02-03	2014-02-13	2014-02-14	2014-02-16	6.61			2014-02-25
Cold	PRS	F3	16	2014-02-06	2014-02-08	2014-02-09	2014-02-11	6.29			2014-02-20
Cold	PRS	F3	17	2014-02-25	2014-03-02	2014-03-03	2014-03-05	6.07			2014-03-18
Cold	PRS	F3	18	2014-02-25	2014-03-04	2014-03-05	2014-03-07	6.48			2014-03-20
Cold	PRS	F3	19	2014-02-25	2014-03-04	2014-03-05	2014-03-07	6.51			2014-03-21
Cold	PRS	F3	20	2014-02-25	2014-03-06	2014-03-07	2014-03-09	6.21			2014-03-23
Cold	PRS	F6	1	2014-02-03	2014-02-07	2014-02-08	2014-02-13	5.79			2014-03-04
Cold	PRS	F6	2	2014-02-03	2014-02-10	2014-02-11	2014-02-16	6.48			2014-03-05
Cold	PRS	F6	3	2014-02-03	2014-02-08	2014-02-09	2014-02-14	5.88			2014-03-04
Cold	PRS	F6	4	2014-02-07	2014-02-09	2014-02-10	2014-02-15	6.07			2014-03-01
Cold	PRS	F6	5	2014-02-25	2014-02-28	2014-03-01	2014-03-06	6.23			2014-03-15
Cold	PRS	F6	6	2014-02-25	2014-03-01	2014-03-02	2014-03-07	5.8			2014-03-20
Cold	PRS	F6	7	2014-02-03	2014-02-09	2014-02-10	2014-02-15	5.78			2014-03-05
Cold	PRS	F6	8	2014-02-03	2014-02-07	2014-02-08	2014-02-13	6.5			2014-02-27
Cold	PRS	F6	9	2014-02-03	2014-02-09	2014-02-10	2014-02-15	6.22			2014-03-02
Cold	PRS	F6	10	2014-02-07	2014-02-11	2014-02-12	2014-02-17	6.56			2014-03-04
Cold	PRS	F6	11	2014-02-25	2014-03-03	2014-03-04	2014-03-09	6.7			2014-03-25
Cold	PRS	F6	12	2014-02-25	2014-03-02	2014-03-03	2014-03-08	6.62			2014-03-31
Cold	PRS	F6	13	2014-02-03	2014-02-11	2014-02-12	2014-02-17	5.63			2014-02-27
Cold	PRS	F6	14	2014-02-04	2014-02-08	2014-02-09	2014-02-14	5.85			2014-02-04
Cold	PRS	F6	15	2014-02-03	2014-02-12	2014-02-13	2014-02-18	6.51			2014-03-05
Cold	PRS	F6	16	2014-02-07	2014-02-11	2014-02-12	2014-02-17	6.07			2014-03-11
Cold	PRS	F6	17	2014-02-25	2014-03-05	2014-03-06	2014-03-11	6.36			2014-03-29
Cold	PRS	F6	18	2014-02-25	2014-03-04	2014-03-05	2014-03-10	6.51			2014-04-03
Cold	PRS	F6	19	2014-02-25	2014-03-02	2014-03-03	2014-03-08	6.58			2014-03-21
Cold	PRS	F6	20	2014-02-25	2014-03-03	2014-03-04	2014-03-09	6.52			2014-03-27
Cold	PRS	F9	1	2014-02-25	2014-03-06	2014-03-07	2014-03-15	6.75			2014-03-26
Cold	PRS	F9	2	2014-03-06	2014-03-10	2014-03-11	2014-03-19	6.67			2014-03-28
Cold	PRS	F9	3	2014-03-06	2014-03-08	2014-03-09	2014-03-17	6			2014-04-08
Cold	PRS	F9	4	2014-03-06	2014-03-09	2014-03-10	2014-03-18	6.28			2014-03-30
Cold	PRS	F9	5	2014-03-06	2014-03-08	2014-03-09	2014-03-17	6.61			2014-03-30
Cold	PRS	F9	6	2014-03-07	2014-03-08	2014-03-09	2014-03-17	6.39			2014-04-05
Cold	PRS	F9	7	2014-02-25	2014-03-06	2014-03-07	2014-03-15	6.49			2014-04-05
Cold	PRS	F9	8	2014-03-06	2014-03-11	2014-03-12	2014-03-20	5.97			2014-03-26
Cold	PRS	F9	9	2014-03-06	2014-03-08	2014-03-09	2014-03-17	5.98	2014-03-24	16
Cold	PRS	F9	10	2014-03-06	2014-03-10	2014-03-11	2014-03-19	6.09			2014-04-09
Cold	PRS	F9	11	2014-03-06	2014-03-11	2014-03-12	2014-03-20	6.29	2014-03-30	19
Cold	PRS	F9	12	2014-03-07	2014-03-12	2014-03-13	2014-03-21	6.56			2014-04-10
Cold	PRS	F9	13	2014-02-25	2014-03-06	2014-03-07	2014-03-15	6.84			2014-04-05
Cold	PRS	F9	14	2014-03-06	2014-03-10	2014-03-11	2014-03-19	6.41			2014-04-09
Cold	PRS	F9	15	2014-03-06	2014-03-10	2014-03-11	2014-03-19	6.34			2014-03-30
Cold	PRS	F9	16	2014-03-06	2014-03-10	2014-03-11	2014-03-19	6.27			2014-04-09
Cold	PRS	F9	17	2014-03-06	2014-03-11	2014-03-12	2014-03-20	6.52			2014-04-09
Cold	PRS	F9	18	2014-03-07	2014-03-09	2014-03-10	2014-03-18	6.16	2014-03-23	14
Cold	PRS	F9	19	2014-03-08	2014-03-13	2014-03-14	2014-03-22	6.38			2014-04-08
Cold	PRS	F9	20	2014-03-08	2014-03-13	2014-03-14	2014-03-22	6.62			2014-04-10
Cold	PRS	F12	1	2014-02-25	2014-03-06	2014-03-07	2014-03-18	6.06			2014-04-05
Cold	PRS	F12	2	2014-03-06	2014-03-08	2014-03-09	2014-03-20	6.46	2014-03-26	18
Cold	PRS	F12	3	2014-03-06	2014-03-10	2014-03-11	2014-03-22	6.11	2014-03-28	18
Cold	PRS	F12	4	2014-03-06	2014-03-10	2014-03-11	2014-03-22	6.31			2014-04-12
Cold	PRS	F12	5	2014-03-06	2014-03-07	2014-03-08	2014-03-19	6.44			2014-04-05
Cold	PRS	F12	6	2014-03-07	2014-03-13	2014-03-14	2014-03-25	6.05	2014-03-28	15
Cold	PRS	F12	7	2014-02-25	2014-03-12	2014-03-13	2014-03-24	6.49	2014-04-01	20
Cold	PRS	F12	8	2014-03-06	2014-03-07	2014-03-08	2014-03-19	5.92			2014-04-09
Cold	PRS	F12	9	2014-03-06	2014-03-13	2014-03-14	2014-03-25	6.42			2014-04-12
Cold	PRS	F12	10	2014-03-06	2014-03-10	2014-03-11	2014-03-22	6.32			2014-04-12
Cold	PRS	F12	11	2014-03-06	2014-03-13	2014-03-14	2014-03-25	6.39			2014-04-12
Cold	PRS	F12	12	2014-03-07	2014-03-13	2014-03-14	2014-03-25	6.56	2014-03-30	17
Cold	PRS	F12	13	2014-02-25	2014-03-08	2014-03-09	2014-03-20	6.7	2014-03-24	16
Cold	PRS	F12	14	2014-03-06	2014-03-11	2014-03-12	2014-03-23	6.2			2014-04-12
Cold	PRS	F12	15	2014-03-06	2014-03-11	2014-03-12	2014-03-23	6.02			2014-04-09
Cold	PRS	F12	16	2014-03-06	2014-03-07	2014-03-08	2014-03-19	6.61	2014-03-24	17
Cold	PRS	F12	17	2014-03-06	2014-03-12	2014-03-13	2014-03-24	6.59			2014-04-09
Cold	PRS	F12	18	2014-03-08	2014-03-13	2014-03-14	2014-03-25	6.04	2014-03-28	15
Cold	PRS	F12	19	2014-03-08	2014-03-09	2014-03-10	2014-03-21	6.44			2014-04-12
Cold	PRS	F12	20	2014-03-08	2014-03-09	2014-03-10	2014-03-21	6.63	2014-03-25	16
Cold	PRS	F15	1	2014-02-25	2014-03-09	2014-03-10	2014-03-24	6.15	2014-03-25	16
Cold	PRS	F15	2	2014-03-06	2014-03-11	2014-03-12	2014-03-26	6.46			2014-04-14
Cold	PRS	F15	3	2014-03-06	2014-03-07	2014-03-08	2014-03-22	5.96	2014-04-05	29
Cold	PRS	F15	4	2014-03-06	2014-03-09	2014-03-10	2014-03-24	6.01			2014-03-29
Cold	PRS	F15	5	2014-03-06	2014-03-12	2014-03-13	2014-03-27	6.44			2014-04-14
Cold	PRS	F15	6	2014-03-08	2014-03-09	2014-03-10	2014-03-24	6.23			2014-03-25
Cold	PRS	F15	7	2014-02-25	2014-03-07	2014-03-08	2014-03-22	6.24	2014-04-05	29
Cold	PRS	F15	8	2014-03-06	2014-03-12	2014-03-13	2014-03-27	6.43	2014-04-05	24
Cold	PRS	F15	9	2014-03-06	2014-03-07	2014-03-08	2014-03-22	6.19	2014-03-27	20
Cold	PRS	F15	10	2014-03-06	2014-03-10	2014-03-11	2014-03-25	6.39			2014-04-14
Cold	PRS	F15	11	2014-03-06	2014-03-13	2014-03-14	2014-03-28	5.92	2014-03-31	18
Cold	PRS	F15	12	2014-03-08	2014-03-09	2014-03-10	2014-03-24	6.37	2014-03-27	18
Cold	PRS	F15	13	2014-02-25	2014-03-08	2014-03-09	2014-03-23	6.12	2014-03-30	22
Cold	PRS	F15	14	2014-03-06	2014-03-10	2014-03-11	2014-03-25	6.37			2014-04-14
Cold	PRS	F15	15	2014-03-06	2014-03-12	2014-03-13	2014-03-27	6.46	2014-04-01	20
Cold	PRS	F15	16	2014-03-06	2014-03-08	2014-03-09	2014-03-23	6.48	2014-04-05	28
Cold	PRS	F15	17	2014-03-06	2014-03-13	2014-03-14	2014-03-28	6.44	2014-03-31	18
Cold	PRS	F15	18	2014-03-08	2014-03-12	2014-03-13	2014-03-27	6.51			2014-04-16
Cold	PRS	F15	19	2014-03-08	2014-03-09	2014-03-10	2014-03-24	6.42	2014-03-25	16
Cold	PRS	F15	20	2014-03-08	2014-03-11	2014-03-12	2014-03-26	6.7	2014-04-05	25
Cold	PRS	F18	1	2014-02-25	2014-03-08	2014-03-09	2014-03-26	6.43	2014-03-23	15
Cold	PRS	F18	2	2014-03-06	2014-03-08	2014-03-09	2014-03-26	6.36	2014-03-29	21
Cold	PRS	F18	3	2014-03-06	2014-03-13	2014-03-14	2014-03-31	6.15	2014-03-30	17
Cold	PRS	F18	4	2014-03-06	2014-03-13	2014-03-14	2014-03-31	6.22	2014-04-05	23
Cold	PRS	F18	5	2014-03-06	2014-03-10	2014-03-11	2014-03-28	6.6	2014-03-30	20
Cold	PRS	F18	6	2014-03-08	2014-03-09	2014-03-10	2014-03-27	6.51	2014-03-29	20
Cold	PRS	F18	7	2014-03-06	2014-03-10	2014-03-11	2014-03-28	6.48	2014-04-03	24
Cold	PRS	F18	8	2014-03-06	2014-03-11	2014-03-12	2014-03-29	6.61			2014-04-12
Cold	PRS	F18	9	2014-03-06	2014-03-12	2014-03-13	2014-03-30	6.41	2014-03-28	16
Cold	PRS	F18	10	2014-03-06	2014-03-13	2014-03-14	2014-03-31	6.47	2014-03-30	17
Cold	PRS	F18	11	2014-03-06	2014-03-12	2014-03-13	2014-03-30	6.36	2014-03-31	19
Cold	PRS	F18	12	2014-03-08	2014-03-11	2014-03-12	2014-03-29	6.71	2014-04-06	26
Cold	PRS	F18	13	2014-03-06	2014-03-08	2014-03-09	2014-03-26	6.56	2014-03-30	22
Cold	PRS	F18	14	2014-03-06	2014-03-10	2014-03-11	2014-03-28	6.49	2014-04-01	22
Cold	PRS	F18	15	2014-03-06	2014-03-13	2014-03-14	2014-03-31	6.37			2014-04-16
Cold	PRS	F18	16	2014-03-06	2014-03-09	2014-03-10	2014-03-27	6.1	2014-03-29	20
Cold	PRS	F18	17	2014-03-06	2014-03-13	2014-03-14	2014-03-31	6.51	2014-03-30	17
Cold	PRS	F18	18	2014-03-08	2014-03-12	2014-03-13	2014-03-30	6.29			2014-04-14
Cold	PRS	F18	19	2014-03-08	2014-03-09	2014-03-10	2014-03-27	6.56	2014-03-29	20
Cold	PRS	F18	20	2014-03-08	2014-03-12	2014-03-13	2014-03-30	6.34	2014-04-01	20
Cold	PRS	SC	1	2014-01-09	2014-01-10			6.49			2014-01-14
Cold	PRS	SC	2	2014-01-10	2014-01-11			6.37			2014-01-29
Cold	PRS	SC	3	2014-01-27	2014-02-06			5.91			2014-02-18
Cold	PRS	SC	4	2014-01-27	2014-02-10			6.52			2014-02-28
Cold	PRS	SC	5	2014-01-27	2014-02-09			6.42			2014-03-01
Cold	PRS	SC	6	2014-01-27	2014-02-06			6.24			2014-02-21
Cold	PRS	SC	7	2014-01-10	2014-01-11			6.33			2014-01-30
Cold	PRS	SC	8	2014-01-27	2014-02-06			6.25			2014-02-25
Cold	PRS	SC	9	2014-01-27	2014-02-03			6.44			2014-02-22
Cold	PRS	SC	10	2014-01-27	2014-02-08			6.67			2014-02-21
Cold	PRS	SC	11	2014-01-27	2014-02-09			6.09			2014-02-25
Cold	PRS	SC	12	2014-01-27	2014-02-05			5.99			2014-02-17
Cold	PRS	SC	13	2014-01-10	2014-01-14			6.21			2014-01-29
Cold	PRS	SC	14	2014-01-27	2014-02-03			6.34			2014-02-15
Cold	PRS	SC	15	2014-01-27	2014-02-09			5.88			2014-02-23
Cold	PRS	SC	16	2014-01-27	2014-02-07			6			2014-02-25
Cold	PRS	SC	17	2014-01-27	2014-02-08			6.09			2014-02-23
Cold	PRS	SC	18	2014-01-27	2014-02-06			6.63			2014-02-24
Cold	PRS	SC	19	2014-01-27	2014-02-01			6.36			2014-02-16
Cold	PRS	SC	20	2014-01-27	2014-02-03			6.23			2014-02-23
